# Supplementary material
Source: PubMed Central journal article supplement (PMC3396541)
Supplement: 1120960109_pnas.201120960SI.pdf [file 1120960109_pnas.201120960SI.pdf]

# Supporting Information

Liu et al. 10.1073/pnas.1120960109

## SI Materials and Methods

**Strains and Growth Conditions.** For GFP-fusion strains, BG-11 medium was supplemented with 50  $\mu\text{g}\cdot\text{mL}^{-1}$  apramycin. Growth of the cells was monitored by turbidity at 750 nm with an SLM Aminco DW-2000 UV/Vis spectrophotometer (SLM Aminco). The *Escherichia coli* strains used in this work were DH5 $\alpha$  and BW25113. *E. coli* was grown aerobically at 30–37 °C in Luria-Bertani (LB) medium. Medium supplements were used where appropriate at the following final concentrations: ampicillin 100  $\mu\text{g}\cdot\text{mL}^{-1}$ , chloramphenicol 10  $\mu\text{g}\cdot\text{mL}^{-1}$ , apramycin 50  $\mu\text{g}\cdot\text{mL}^{-1}$  and arabinose 100  $\mu\text{M}$ .

**Respiratory Electron Transport.** O<sub>2</sub> uptake of cell cultures was measured in the dark at room temperature in a Clarke-type oxygen electrode (OxyLab 2; Hansatech). One milliliter of cell suspension with Chlorophyll (Chl) concentration of 10  $\mu\text{M}$  was placed into the electrode chamber, aerated, and sealed from the atmosphere.

**P<sub>700</sub><sup>+</sup> Rereduction Measurements.** Cells grown at late log phase in fresh BG-11 with a Chl concentration of 10  $\mu\text{M}$  were incubated in the absence or presence of 20  $\mu\text{M}$  DCMU (a PSII inhibitor), in a glass cuvette with dimensions of 1  $\times$  1 cm. Cells were dark adapted for about 5 min and incubated in the presence of DCMU for 1 min before the measurement (except for cells preadapted for 30 min in ML in the presence of DCMU, where no additional DCMU was added). Eight saturating flashes from a xenon lamp (6  $\mu\text{s}$  half peak width, 20 J per flash, filtered with a Schott BG-39 filter; 30 Hz) were applied perpendicular to the measuring beam to both sides of the cuvette to illuminate the cells evenly. The kinetics of P<sub>700</sub><sup>+</sup> rereduction were recorded by a photomultiplier tube screened by narrow band-pass (695–707

nm interference notch) and RG 660 long-pass filters. For each measurement, 25 transients, with 2-s dark adaptation before each train of flashes, were averaged.

**Membrane Preparation, Protein Analysis, and Immunoblotting.** *Synechococcus* membrane fractions and soluble fractions for SDS-polyacrylamide gel electrophoresis (SDS/PAGE) analysis were prepared by glass bead (212–300  $\mu\text{m}$  in diameter) breakage at 4 °C followed by centrifugation (1). For Blue-Native polyacrylamide gel electrophoresis (BN-PAGE) isolated membranes were prepared according to the previous method (2). Chl *a* content was determined by extraction into methanol and absorption measurement at 666 and 750 nm (3). Protein concentration was determined using a NanoVue spectrophotometer (GE Healthcare). Similar amounts of protein samples with 6  $\mu\text{g}$  Chl were loaded on the gels for total protein and membrane fraction samples, and 80  $\mu\text{g}$  of proteins were loaded for the soluble fraction samples. Membrane protein samples were either separated on 15% (vol/vol) denaturing SDS/PAGE gels containing 6 M urea (4) or on 5–12.5% (vol/vol) linear gradient native BN-PAGE gels (5, 6) as described previously (7) with modifications (8, 9). For the serial dilution Western blots, the samples were loaded on the gel with 1  $\mu\text{g}$  Chl for 100%, 0.50  $\mu\text{g}$  Chl for 50%, 0.25  $\mu\text{g}$  Chl for 25%, and 0.1  $\mu\text{g}$  Chl for 10%. Gels were either stained with Coomassie Blue R-250 or electroblotted onto nitrocellulose membrane (0.2- $\mu\text{m}$  pore size; Bio-Rad Laboratories). Immunoblotting analyses were performed with primary rabbit polyclonal anti-GFP antibody diluted 1:6,000, and horseradish peroxidase-conjugated goat antirabbit IgG secondary antibody (GE Healthcare) diluted 1:10,000. Signals were visualized using a chemiluminescence kit (SuperSignal West Pico; Pierce).

1. Norling B, Zak E, Andersson B, Pakrasi H (1998) 2D-isolation of pure plasma and thylakoid membranes from the cyanobacterium *Synechocystis* sp. PCC 6803. *FEBS Lett* 436:189–192.
2. Zhang P, et al. (2004) Expression and functional roles of the two distinct NDH-1 complexes and the carbon acquisition complex NdhD3/NdhF3/CupA/Sll1735 in *Synechocystis* sp PCC 6803. *Plant Cell* 16:3326–3340.
3. Komenda J, Barber J (1995) Comparison of psbO and psbH deletion mutants of *Synechocystis* PCC 6803 indicates that degradation of D1 protein is regulated by the QB site and dependent on protein synthesis. *Biochemistry* 34:9625–9631.
4. Laemmli UK (1970) Cleavage of structural proteins during the assembly of the head of bacteriophage T4. *Nature* 227:680–685.
5. Schagger H, von Jagow G (1991) Blue native electrophoresis for isolation of membrane protein complexes in enzymatically active form. *Anal Biochem* 199:223–231.
6. Schagger H, Cramer WA, von Jagow G (1994) Analysis of molecular masses and oligomeric states of protein complexes by blue native electrophoresis and isolation of membrane protein complexes by two-dimensional native electrophoresis. *Anal Biochem* 217:220–230.
7. Kügler M, Jansch L, Kruff V, Schmitz UK, Braun H-P (1997) Analysis of the chloroplast protein complexes by blue-native polyacrylamide gel electrophoresis (BN-PAGE). *Photosynth Res* 53:35–44.
8. Herranen M, et al. (2004) Towards functional proteomics of membrane protein complexes in *Synechocystis* sp. PCC 6803. *Plant Physiol* 134:470–481.
9. Cline K, Mori H (2001) Thylakoid DeltapH-dependent precursor proteins bind to a cpTatC-Hcf106 complex before Tha4-dependent transport. *J Cell Biol* 154:719–729.

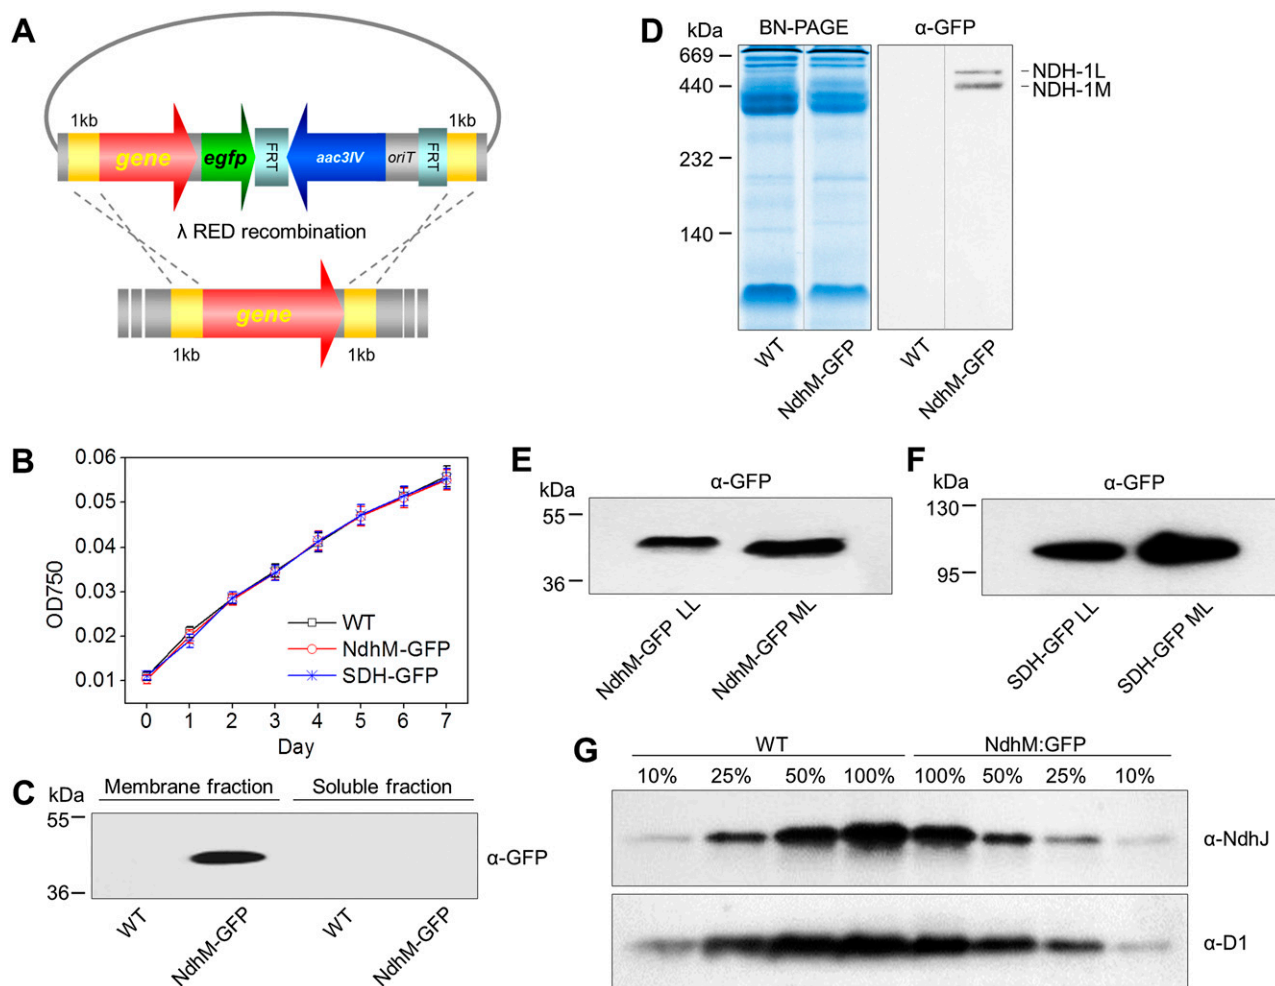

**Fig. S1.** Construction and characterization of NDH-1:eGFP and SDH:eGFP strains of *Synechococcus*. (A) Strategy of GFP fusion using REDIRECT protocol. (B) Comparison of the growth of WT *Synechococcus*, NDH-1:eGFP, and SDH:eGFP strains. Growth was monitored by turbidity of cell suspensions at 750 nm. Results are a mean  $\pm$  SD of three independent cultures. (C) Immunoblot with anti-GFP antibody of membrane fractions and soluble fractions of the NDH-1:eGFP strain based on SDS/PAGE (15%). The band at around 40 kDa is consistent with the fusion of NdhM and eGFP. (D) BN-PAGE and immunoblots using anti-GFP antibody show that NDH-1:eGFP is incorporated into complete NDH-1 complexes. Western blot bands were assigned on the basis of their molecular weights according to (2, 8). Gel lanes were grouped from the same gel. (E and F) SDS/PAGE immunoblots showing that eGFP is fused to NdhM and SdhA respectively, under complexes under both ML and LL conditions. (G) Relative amounts of NDH-1 complexes in wild-type and NDH-1:eGFP strain measured by SDS/PAGE immunoblots with anti-NdhJ. Antibody to the D1 protein of Photosystem II is used as a reference. Samples are loaded on the basis of chlorophyll concentration (1  $\mu$ g for 100%) and diluted to 50, 25, and 10% of initial concentration. Ratios of NDH-1:D1 staining at increasing dilution are 0.58, 0.57, 0.50, 0.48 in wild-type and 0.58, 0.57, 0.49, 0.48 in the NDH-1:eGFP strain.

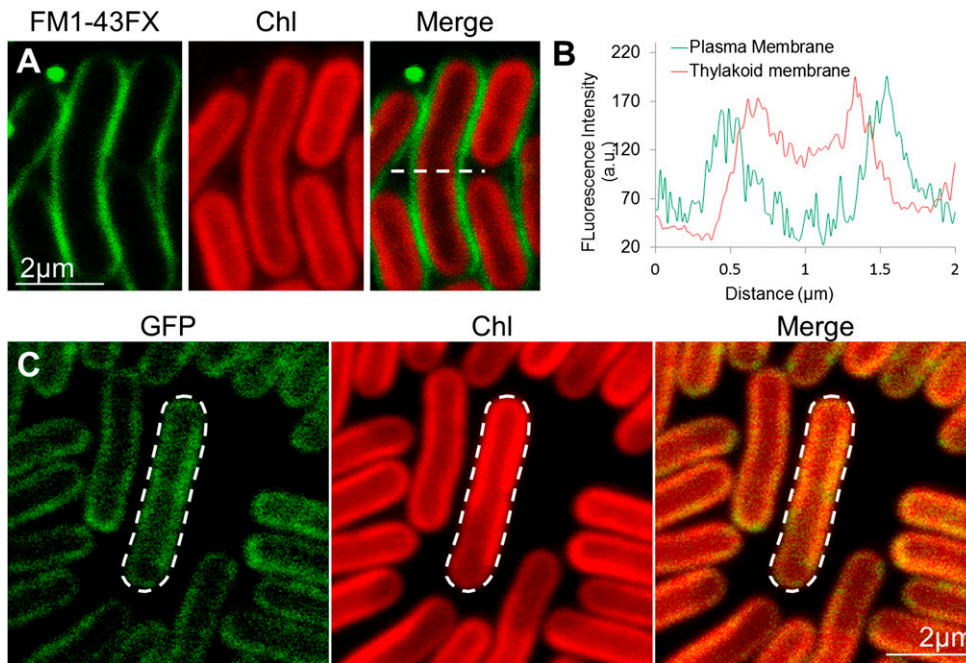

**Fig. S2.** *Synechococcus* cytoplasmic and thylakoid membranes can be distinguished in confocal images. (A) FM1-43FX, a green fluorescent membrane marker, was used to stain the cytoplasmic membrane (1). (B) Cross-section analysis of green (FM1-43FX) and red (chlorophyll) fluorescence along the white line in A, indicating a separation of  $190 \pm 19$  nm (SD,  $n = 50$ ) between the cytoplasmic and thylakoid membranes (C). Outlines of the cytoplasmic membranes (broken lines) based on the cross-section data, superimposed on images of NDH-1:eGFP and chlorophyll fluorescence.

1. Schneider D, Fuhrmann E, Scholz I, Hess WR, Graumann PL (2007) Fluorescence staining of live cyanobacterial cells suggest non-stringent chromosome segregation and absence of a connection between cytoplasmic and thylakoid membranes. *BMC Cell Biol* 8:39.

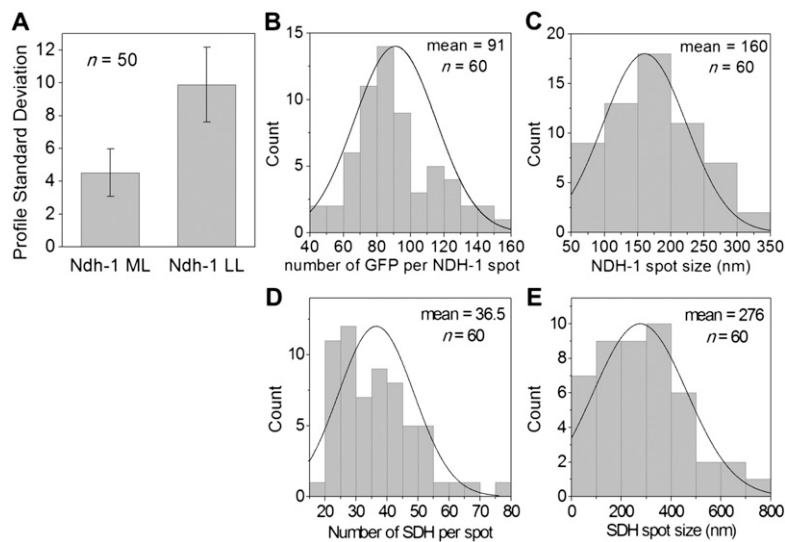

**Fig. S3.** Analysis of NDH-1:eGFP and SDH:eGFP distributions. (A) SDs of NDH-1:eGFP fluorescence profiles at ML and LL ( $n = 50$ ,  $P = 10^{-7}$ ). (B) There are around  $91 \pm 30$  (SD,  $n = 60$ ) NDH-1:eGFP complexes per NDH-1 patch. (C) The diameter of the NDH-1 spots (corrected for the microscope point spread function) varies from 60 to 350 nm, with a mean of  $160 \pm 28$  nm (SD,  $n = 60$ ). (D) There are around  $37 \pm 12$  (SD) SDH:eGFP complexes per SDH patch ( $n = 60$ ). (E) The mean diameter of the SDH patches (corrected for the microscope point spread function) is  $276 \pm 188$  nm (SD,  $n = 60$ ).

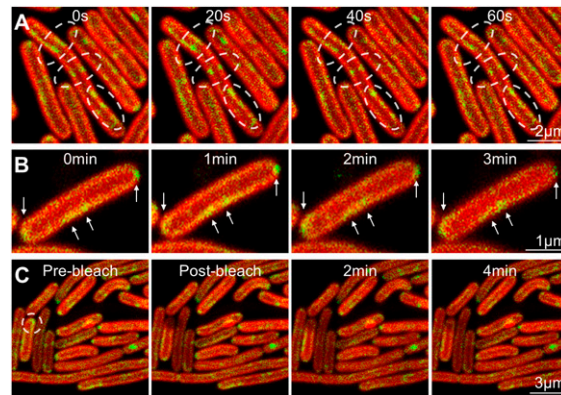

**Fig. 54.** Immobility of the NDH-1:eGFP patches in vivo. (A) Successive confocal images recorded over 60 s. (B) Successive confocal images recorded over 3 min. (C) FRAP analysis of the NDH-1 patches. No recovery was observed, indicating that diffusion of NDH-1 complexes between neighboring spots is not detectable on this timescale.

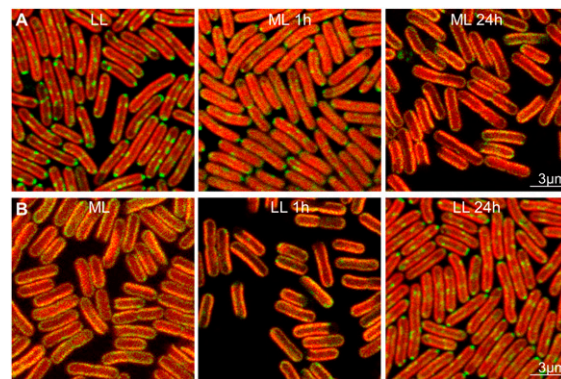

**Fig. 55.** Redistribution of NDH-1 complexes in response to light changes. (A) Fluorescence image under LL, after transferring to ML for 1 h and after 24 h. (B) Fluorescence image of ML-adapted cells, after transferring to LL for 1 h and after 24 h.

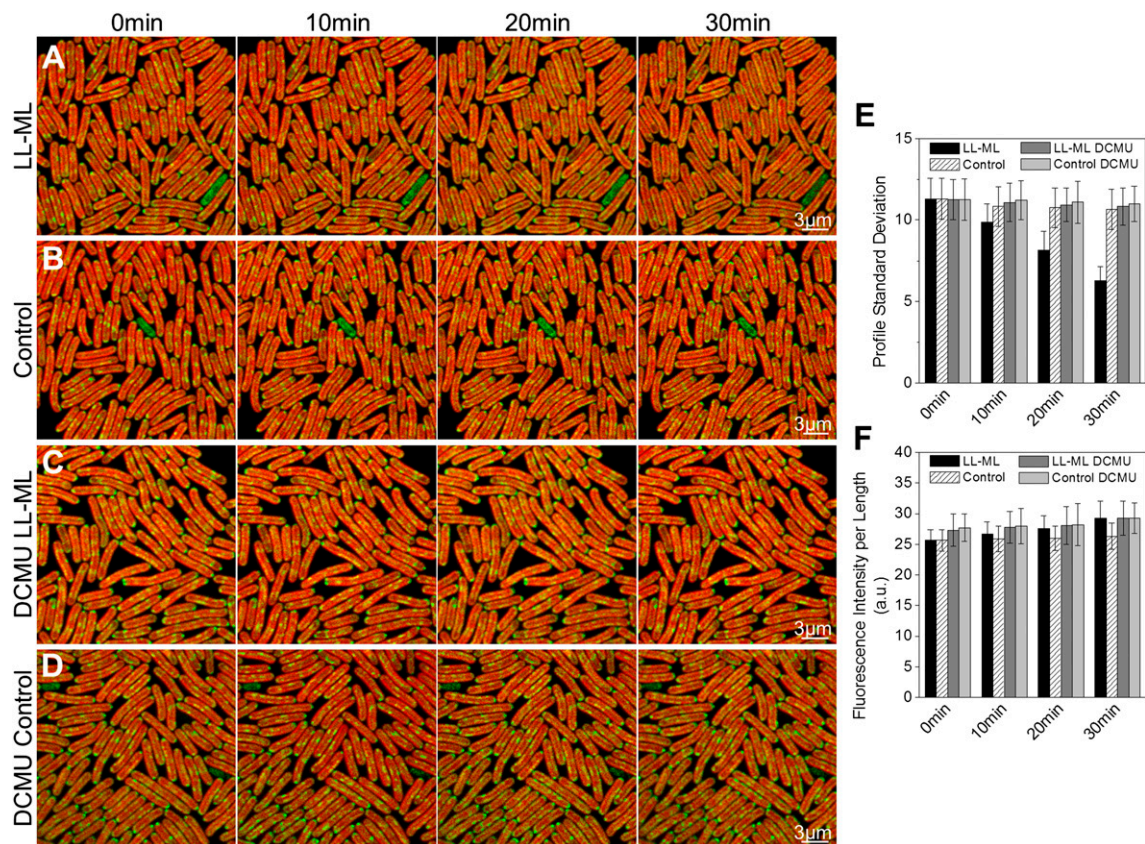

**Fig. 56.** Tracking of NDH-1 complexes within a single set of cells during illumination with continuous white-light at  $500 \mu\text{mol}\cdot\text{m}^{-2}\cdot\text{s}^{-1}$  on the microscope stage in 30 min. (A) Confocal images of the same set of NDH-1:eGFP cells. (B) Control for A showing that the NDH-1:eGFP patches do not disperse or move when cells are kept in the dark between recording of images. (C) The same set of NDH-1:eGFP cells in the presence of DCMU. (D) Control for C showing that the NDH-1:eGFP patches do not disperse or move when cells in the presence of DCMU are kept in the dark between recording of images. (E) Fluorescence profile variances and (F) normalized fluorescence intensities for the low-light grown NDH-1:eGFP cells with/without DCMU exposed to intense light (LL-ML) and control (in the dark) for 10, 20, and 30 min ( $n = 50$ ). Data analysis is shown in Fig. 1 in the main text.

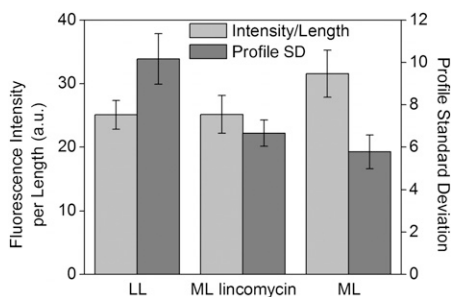

**Fig. 57.** Redistribution of the NDH-1 complexes does not depend on de novo protein biosynthesis. Lincomycin was added in the culture medium (final concentration,  $400 \mu\text{g}\cdot\text{ml}^{-1}$ ) (1, 2) to inhibit protein synthesis. After switching from LL to ML, the total GFP fluorescence increases in untreated cells but not in lincomycin-treated cells (light gray bar). The SD of the NDH-1 distribution profile (gray) decreases (two-tailed Student  $t$  test,  $P = 10^{-11}$ ) from  $10.16 \pm 1.19$  in LL (SD,  $n = 30$ ) to  $6.65 \pm 0.62$  in ML (SD,  $n = 30$ ) with the presence of lincomycin, indicating that protein biosynthesis is not required for the NDH-1 redistribution.

- Herranen M, Tyystjärvi T, Aro EM (2005) Regulation of photosystem I reaction center genes in *Synechocystis* sp. strain PCC 6803 during light acclimation. *Plant Cell Physiol* 46:1484–1493.
- Tyystjärvi E, Aro EM (1996) The rate constant of photoinhibition, measured in lincomycin-treated leaves, is directly proportional to light intensity. *Proc Natl Acad Sci USA* 93:2213–2218.

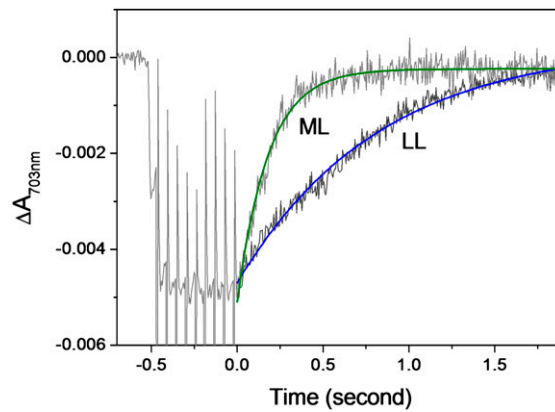

**Fig. S8.** Kinetics of the  $P_{700}^+$  rereduction in the cells under ML and LL.  $P_{700}$  rereduction kinetics were determined at room temperature by analysis of flash-induced absorbance changes at 703 nm as indicated in *Materials and Methods*. Cells grown at late log phase in fresh BG-11 were incubated in the presence of DCMU before the measurement. Eight saturating flashes from a xenon lamp were applied, and the kinetics of  $P_{700}^+$  rereduction were fitted with a single exponential decay.

**Table S1.** Primers used in this study (sequences 5'–3')

| Primer                   | Sequence                                                    |
|--------------------------|-------------------------------------------------------------|
| <b>Respiratory genes</b> |                                                             |
| Fsynpcc7942_1982         | TCCGGCAACAGTAGCTTGAG                                        |
| Rsynpcc7942_1982         | CCATCCGCAAGGTGATTGAC                                        |
| Fsynpcc7942_0641         | ACCTCAGCTCTGGGTGATAG                                        |
| Rsynpcc7942_0641         | CGGCATTACTCGCTTTACG                                         |
| <b>GFP fusion</b>        |                                                             |
| Fsynpcc7942_1982GFP      | GTGCTGAACTACAGCATGGGCGTGCCGCAAGCCGTTGTCCTGCCGGGCCCGGAGCTGCC |
| Rsynpcc7942_1982GFP      | GTTGCCCTGCGAGGTGAGTCCGTAGACTCAACGCCTGCAATTCGGGGATCCGTCGACC  |
| Fsynpcc7942_0641GFP      | GAGTTCAAGACGTTAGTTCCAGCCAGCGAAACTATCAACTGCCGGGCCCGGAGCTGCC  |
| Rsynpcc7942_0641GFP      | GGCGGGGACTAAAGCCCCATTATTGCTTAAATGGAGGCGATTCCGGGGATCCGTCGACC |
| <b>Segregation</b>       |                                                             |
| Fsynpcc7942_1982seg      | GTACAATCTGCGTCGTATCG                                        |
| Rsynpcc7942_1982seg      | AGCCAAGGCCAAGGTGATTC                                        |
| Fsynpcc7942_0641seg      | GCTCTGCACCGTGAAGAATC                                        |
| Rsynpcc7942_0641seg      | TGTTAGCGACGGAAGGACTC                                        |
| <b>Sequencing</b>        |                                                             |
| Seq1synpcc7942_1982      | TTTGGCTGGAAGGGCAGAAG                                        |
| Seq2synpcc7942_1982      | GTACAATCTGCGTCGTATCG                                        |
| Seq1synpcc7942_0641      | GCCGGTGATTCATAGCAAAG                                        |
| Seq2synpcc7942_0641      | TGTTAGCGACGGAAGGACTC                                        |
